# Supplementary material for: Paravertebral block with modified catheter under surgeon’s direct vision after video-assisted thoracoscopic lobectomy
Source: PubMed Central journal article supplement — J Thorac Dis. 2020 Aug;12(8):4115–25. doi: 10.21037/jtd-20-1068B (PMC7475592; doi:10.21037/jtd-20-1068b), 2020-08
Supplement: jtd-12-08-4115-dss.pdf [file jtd-12-08-4115-dss.pdf]

## Data Sharing Statement

|                     |                                                                                                                                                    |                                                            |
|---------------------|----------------------------------------------------------------------------------------------------------------------------------------------------|------------------------------------------------------------|
| <b>Article Info</b> | <a href="http://dx.doi.org/10.21037/jtd-20-1068B">http://dx.doi.org/10.21037/jtd-20-1068B</a> .                                                    |                                                            |
| <b>Item</b>         | <b>Question</b>                                                                                                                                    | <b>Authors' Response<br/>(place "-" if not applicable)</b> |
| 1                   | Would you like to share data collected for your study to others?                                                                                   | No                                                         |
| 2                   | If not, would you like to share the reason for your decision?                                                                                      | Because our study hasn't ended.                            |
| 3                   | What data in particular will be shared?                                                                                                            | -                                                          |
| 4                   | Any other documents will be share? Such as study protocol, statistical analysis plan, informed consent form, clinical study report, analytic code. | -                                                          |
| 5                   | When will data availability begin?                                                                                                                 | 2024.12.01                                                 |
| 6                   | When will data availability end?                                                                                                                   | 2024.12.30                                                 |
| 7                   | To whom will you share the data?                                                                                                                   | -                                                          |
| 8                   | For what type of analysis or purpose?                                                                                                              | -                                                          |
| 9                   | How or where can the data/documents be obtained?                                                                                                   | -                                                          |
| 10                  | Any other restrictions?                                                                                                                            | -                                                          |
